# Supplementary material for: Micropollutant content of Sargassum drifted ashore: arsenic and chlordecone threat assessment and management recommendations for the Caribbean
Source: Research Square preprint supplement (doi:10.21203/rs.3.rs-1210563/v1), 2022-02-09
Supplement: Supplementary file 1 [file 6488d28f713b8198b6994a8e.docx]

**Appendix 1**

**Field contamination: Sargassum content (average, n=3).**

**Table A1: Campaign 1, t for Sargassum piles.**

**Table A2: Campaign 2.**

**Table A3: detail of campaign 2 in Martinique. _1: grounded and at least partly dried and browned, being drifted to shore but not yet grounded, _2: recently grounded, i.e. still wet, _3 close to be grounded, in the beating of the waves, and _4 still in seawater.**

| **Municipality** | **Site** | **Dry matter** | **Mineral matter** | **Organic matter** | **Total organic carbon** | **Nitrogen** | **C/N ratio** | **OM**  **/DM ratio** | **CLD** | **5b-hydro CLD** | **As** | **As(III)** | **As(V)** | **MMA** | **DMA** | **AsB** | **AsC** | **As inorg** | **As org** | **As Tot Calc.** | **Speciation yield** |
| --- | --- | --- | --- | --- | --- | --- | --- | --- | --- | --- | --- | --- | --- | --- | --- | --- | --- | --- | --- | --- | --- |
| **Unit** |  | **%** | **%** | **%** | **mg/kg dw** | **mg(N)**  **/kg dw** | |  | **µg/kg dw** | **µg/kg dw** | **mg/kg dw** | **mg/kg dw** | **mg/kg dw** | **mg/kg dw** | **mg/kg dw** | **mg/kg dw** | **mg/kg dw** | **mg/kg dw** | **mg/kg dw** | **mg/kg dw** |  |
| Le Gosier | 1G02 | 16.3 | 38.9 | 61.1 | 229294 | 6904 | 33.5 | 3.80 | < | < | 89.9 | 3.82 | 60.64 | 4.48 | 20.25 | 1.48 | 0.22 | 64.46 | 26.41 | 90.87 | 1.01 |
| Le Gosier | 1G03 | 15.3 | 35.4 | 64.6 | 239985 | 7569 | 32.0 | 4.28 | < | < | 90.4 | 2.69 | 55.02 | 1.70 | 22.02 | 1.51 | 0.26 | 57.70 | 25.49 | 83.1 | 0.92 |
| St Anne | 1G04 | 17.5 | 42.6 | 57.4 | 219502 | 6075 | 36.6 | 3.35 | < | < | 85.0 | 6.36 | 56.19 | 12.38 | 8.96 | 0.80 | 0.21 | 62.54 | 22.35 | 84.89 | 1.00 |
| St François | 1G05 | 19.8 | 44.8 | 55.2 | 209399 | 5622 | 36.9 | 2.98 | < | < | 77.8 | 3.82 | 53.92 | 4.70 | 10.50 | 0.78 | 0.09 | 57.74 | 16.03 | 73.77 | 0.95 |
| St François | 1G06 | 17.1 | 35.6 | 64.4 | 248653 | 6028 | 41.3 | 3.77 | < | < | 93.4 | 2.84 | 69.9 | 1.23 | 10.84 | 0.77 | 0.23 | 72.74 | 13.04 | 85.79 | 0.92 |
| Le Moule | 1G07 | 17.0 | 36.1 | 63.9 | 240462 | 7061 | 34.3 | 3.76 | < | < | 68.8 | 2.09 | 65.79 | 9.96 | 7.13 | 0.49 | 0.50 | 67.88 | 18.08 | 85.95 | 2.00 |
| Anse-Bertrand | 1G08 | 14.4 | 33.2 | 66.8 | 225415 | 6454 | 35.2 | 4.65 | < | < | 41.1 | 0.42 | 11.36 | 3.70 | 4.11 | 2.00 | 0.72 | 11.78 | 10.53 | 22.31 | 0.74 |
| Petit Bourg | 1G09 | 16.4 | 33.3 | 66.7 | 234005 | 6835 | 34.5 | 4.08 | 6.3 | < | 78.4 | 2.03 | 54.46 | 2.86 | 17.14 | 1.60 | 0.93 | 56.47 | 22.51 | 78.99 | 1.01 |
| Goyave | 1G10 | 16.3 | 35.4 | 64.6 | 235557 | 6947 | 33.9 | 3.97 | 5.4 | < | 89.0 | 1.66 | 68.13 | 3.29 | 14.02 | 0.99 | 0.52 | 69.79 | 18.81 | 88.60 | 1.00 |
| Cap. Belle Eau | 1G11 | 16.2 | 35.1 | 64.9 | 231806 | 6724 | 34.5 | 4.02 | 64.8 | < | 89.2 | 1.35 | 73.43 | 3.74 | 7.86 | 1.04 | 0.68 | 74.78 | 13.28 | 88.07 | 0.98 |
| Cap. Belle Eau | 1G12 | 17.3 | 36.6 | 63.4 | 247855 | 6514 | 38.1 | 3.67 | 161.3 | 3.9 | 88.0 | 0.62 | 61.13 | 1.07 | 19.23 | 1.27 | 0.37 | 61.75 | 21.91 | 83.66 | 0.95 |
| Vieux Fort | 1G14 | 17.0 | 36.0 | 64.0 | 239634 | 6285 | 38.2 | 3.76 | 58.0 | < | 78.0 | 1.47 | 51.08 | 0.90 | 10.45 | 0.74 | 0.29 | 52.55 | 12.38 | 64.93 | 0.83 |
| Cap. Belle Eau | 1G15 | 17.0 | 37.6 | 62.4 | 229783 | 6443 | 35.6 | 3.71 | 471.7 | 9.8 | 73.25 | 0.79 | 49.34 | 1.78 | 9.34 | 0.58 | 0.40 | 50.13 | 12.11 | 62.25 | 0.86 |
| Baie Mahault | 1G16 | 14.1 | 35.3 | 64.7 | 243457 | 7463 | 33.3 | 4.60 | 74.9 | < | 85.1 | 3.79 | 51.38 | 0.99 | 11.59 | < | 1.23 | 55.18 | 13.82 | 68.99 | 0.81 |
| La Désirade | 1G17 | 14.7 | 36.5 | 63.5 | 250239 | 8550 | 29.3 | 4.40 | < | < | 45.4 | 1.73 | 24.73 | 0.64 | 6.65 | 0.31 | 0.62 | 26.45 | 8.22 | 34.68 | 0.76 |
| Le Diamant | 1M02t | 15.8 | 43.7 | 56.3 | 200165 | 7723 | 24.8 | 3.99 | < | < | 24.5 | 0.74 | 15.07 | 0.61 | 3.87 | 0.24 | 1.85 | 15.81 | 6.56 | 22.37 | 0.90 |
| St Anne | 1M03t | 51.6 | 84.3 | 15.7 | 43688 | 5604 | 7.79 | 0.30 | < | < | 9.67 | 1.82 | 1.41 | 0.16 | 0.40 | 0.23 | 0.07 | 3.23 | 0.82 | 4.05 | 0.42 |
| St Anne | 1M04 | 17.1 | 41.5 | 58.5 | 215120 | 9583 | 22.5 | 3.41 | < | < | 73.5 | 2.94 | 54.67 | 0.83 | 3.98 | 1.47 | 0.77 | 57.61 | 7.05 | 64.66 | 0.88 |
| Le Vauclin | 1M06t | 33.2 | 75.3 | 24.7 | 64145 | 5338 | 12.0 | 0.75 | < | < | 22.2 | 9.47 | 2.23 | 1.50 | 1.27 | 0.44 | 2.12 | 11.69 | 5.27 | 16.96 | 0.78 |
| Le Vauclin | 1M07 | 18.6 | 42.8 | 57.2 | 192745 | 11508 | 17.9 | 3.15 | < | < | 45.2 | 7.18 | 23.41 | 1.23 | 2.23 | 0.55 | 1.46 | 30.59 | 5.45 | 36.04 | 0.81 |
| Le Marigot | 1M09 | 13.6 | 33.9 | 66.1 | 258867 | 10232 | 25.6 | 5.0 | 206 | < | 73.5 | 5.67 | 41.14 | 21.15 | 1.72 | 0.49 | 2.0 | 46.87 | 25.34 | 72.21 | 0.97 |
| Ste Marie | 1M10 | 30.8 | 55.3 | 44.7 | 178330 | 6910 | 26.7 | 1.90 | 47.1 | < | 75.4 | 0.48 | 36.62 | 14.78 | 1.13 | 0.94 | 0.23 | 37.08 | 17.05 | 54.13 | 0.68 |
| La Trinité | 1M11 | 14.2 | 42.9 | 57.1 | 219572 | 8728 | 25.5 | 4.02 | < | < | 125.7 | 0.34 | 91.08 | 25.45 | 2.68 | 2.39 | 0.84 | 91.41 | 31.36 | 122.77 | 1.01 |
| La Trinité | 1M12 | 15.5 | 34.0 | 66.0 | 207509 | 9060 | 23.7 | 4.27 | < | < | 89.8 | 3.85 | 58.30 | 17.94 | 2.45 | 2.91 | 5.50 | 62.26 | 28.86 | 91.12 | 1.02 |
| La Trinité | 1M13 | 17.3 | 38.9 | 61.1 | 237329 | 9041 | 26.8 | 3.53 | < | < | 86.2 | 14.26 | 53.48 | 25.60 | 4.16 | 0.70 | 0.98 | 67.74 | 31.40 | 99.14 | 1.23 |
| La Trinité | 1M14 | 22.3 | 45.4 | 54.6 | 167774 | 6878 | 23.8 | 2.86 | 279.3 | 16.8 | 73.5 | 5.48 | 20.04 | 18.80 | 1.91 | 2.38 | 0.97 | 25.54 | 22.59 | 48.13 | 0.66 |
| Le Robert | 1M15 | 12.4 | 39.3 | 60.7 | 183513 | 12190 | 15.1 | 4.90 | < | < | 13.5 | 3.70 | 6.43 | 0.95 | 1.10 | 0.44 | 1.77 | 10.13 | 4.23 | 14.36 | 1.07 |
| Le Robert | 1M15t | 14.4 | 39.5 | 60.5 | 212060 | 10221 | 22.2 | 4.21 | < | < | 50.1 | 6.71 | 31.56 | 11.90 | 1.40 | 0.51 | 3.15 | 38.26 | 16.92 | 55.18 | 1.06 |
| Le Marin | 1M19 | 15.4 | 36.8 | 63.2 | 262282 | 7777 | 34.2 | 4.12 | < | < | 67.7 | 2.57 | 34.78 | 24.99 | 0.89 | 6.14 | 0.71 | 37.32 | 32.69 | 70.01 | 1.03 |
| Le Vauclin | 1M20 | 16.7 | 42.5 | 57.5 | 226449 | 10473 | 21.8 | 3.46 | < | < | 69.81 | 0.15 | 40.82 | 16.80 | 1.20 | 11.98 | < | 40.91 | 29.98 | 70.89 | 1.02 |
| Le François | 1M21 | 15.17 | 40.65 | 59.3 | 229125 | 9498 | 24.2 | 3.92 | < | < | 68.91 | 0.24 | 42.37 | 18.98 | 1.50 | 10.15 | 0.44 | 42.61 | 31.05 | 73.66 | 1.07 |
| Le François | 1M16 | 22.8 | 34.9 | 65.1 | 241146 | 8534 | 28.9 | 3.50 | 18.9 | < | 80.48 | 5.01 | 45.0 | 12.87 | 4.13 | 5.13 | 0.70 | 50.01 | 22.79 | 72.80 | 0.87 |
| Le François | 1M17 | 20.6 | 38.3 | 61.7 | 231449 | 10758 | 22.3 | 3.05 | < | < | 75.6 | 14.91 | 28.29 | 5.40 | 4.85 | 5.14 | 0.42 | 43.21 | 15.80 | 59.00 | 0.77 |
| La Trinité | 1M18 | 14 | 42.6 | 57.4 | 217775 | 19404 | 13.7 | 4.10 | < | < | 35.28 | 0.65 | 19.15 | 7.02 | 1.20 | 6.18 | 1.69 | 19.85 | 16.08 | 35.94 | 0.86 |
| Saint Lucia Channel | 1M_T | 13.8 | 34.8 | 65.2 | 221854 | 8072 | 27.6 | 4.89 | < | < | 100.5 | 0.2 | 42.0 | 28.54 | 0.35 | 5.70 | 1.39 | 42.20 | 35.98 | 78.18 | 0.76 |

**Table A1.**

| **Municipality** | **Site** | **Dry matter** | **Mineral matter** | **Organic matter** | **Total organic carbon** | **Nitrogen** | **C/N** | **OM**  **/DM** | **CLD** | **5b-hydro CLD** | **As** | **As(III)** | **As(V)** | **MMA** | **DMA** | **AsB** | **AsC** | **As inorg** | **As org** | **As Tot Calc.** | **Speciation yield** |
| --- | --- | --- | --- | --- | --- | --- | --- | --- | --- | --- | --- | --- | --- | --- | --- | --- | --- | --- | --- | --- | --- |
|  |  | **%** | **%** | **%** | **mg/kg dw** | **mg(N)**  **/kg dw** | **ratio** | **ratio** | **µg/kg dw** | **µg/kg dw** | **µg/kg dw** | **µg/kg dw** | **µg/kg dw** | **µg/kg dw** | **µg/kg dw** | **µg/kg dw** | **µg/kg dw** | **µg/kg dw** | **µg/kg dw** | **µg/kg dw** |  |
| Le Diamant | M02 | 20.5 | 48.1 | 51.9 | 202150 | 7977 | 25.7 | 2.69 | < | < | 88.52 | 0.32 | 59.17 | 21.84 | 1.25 | 7.57 | 0.05 | 59.49 | 30.65 | 90.15 | 1.00 |
| Sainte Anne | M04 | 18.8 | 47.0 | 53.0 | 211340 | 7979 | 26.4 | 2.97 | < | < | 77.09 | 0.84 | 50.47 | 22.29 | 1.77 | 7.54 | 0.55 | 51.30 | 32.14 | 83.45 | 1.06 |
| Le Vauclin | M06&07 | 36.1 | 39.8 | 60.1 | 246517 | 7895 | 31.2 | 2.39 | < | < | 88.37 | 0.14 | 51.47 | 21.48 | 1.4 | 5.44 | 0.28 | 51.61 | 28.59 | 80.20 | 0.91 |
| Le Marigot | M09 | 31.0 | 42.7 | 57.3 | 197247 | 7597 | 25.9 | 2.60 | 357.2 | 4.1 | 71.82 | 0.34 | 38.33 | 17.94 | 1.75 | 5.07 | 0.59 | 38.67 | 25.34 | 64.01 | 0.89 |
| Ste Marie | M10 | 26.8 | 44.1 | 55.8 | 198860 | 7512 | 26.6 | 2.81 | 87.7 | < | 91.72 | 0.55 | 55.3 | 26.87 | 1.52 | 7.815 | 0.71 | 55.84 | 36.87 | 92.72 | 1.02 |
| La Trinité | M12 | 29.4 | 42.7 | 57.3 | 210595 | 7973 | 26.6 | 2.58 | 3.2 | < | 76.68 | 0.33 | 40.87 | 22.77 | 1.55 | 6.51 | 0.06 | 41.21 | 30.86 | 72.07 | 0.95 |
| La Trinité | M13 | 27.3 | 41.0 | 59.0 | 222060 | 9037 | 24.6 | 2.92 | < | < | 89.9 | 0.57 | 57.32 | 23.92 | 2.35 | 6.255 | 1.60 | 57.89 | 32.53 | 90.43 | 0.98 |
| La Trinité | M14 | 32.1 | 38.8 | 61.3 | 228490 | 8709 | 26.5 | 2.91 | 582.8 | 25.3 | 80.99 | 0.33 | 47.27 | 25.73 | 0.83 | 8.5825 | 0.10 | 47.6 | 35.19 | 82.79 | 1.02 |
| Le Robert | M15 | 17.8 | 42.5 | 57.5 | 221924 | 8774 | 25.8 | 3.24 | < | < | 93.6 | 1.51 | 53.57 | 30.46 | 2.71 | 9.49 | 0.72 | 55.07 | 43.29 | 98.37 | 1.04 |
| Le François | M16 | 25.0 | 40.3 | 59.7 | 230237 | 8728 | 26.4 | 2.90 | 76.6 | 5.3 | 89.18 | 0.11 | 56.27 | 23.575 | 1.53 | 5.5775 | 0.24 | 56.38 | 30.88 | 87.26 | 0.96 |
| Le Robert | M17 | 28.4 | 40.2 | 59.8 | 221464 | 10040 | 22.2 | 2.72 | < | < | 84.24 | 0.47 | 52.97 | 20.68 | 1.10 | 7.46 | 0.18 | 53.44 | 29.35 | 82.79 | 0.97 |
| Le Robert | M18 | 26.0 | 41.5 | 58.4 | 218891 | 13206 | 18.1 | 3.07 | 4.0 | 1.2 | 28.84 | 0.46 | 16.81 | 6.452 | 0.73 | 4.28 | 0.24 | 17.27 | 11.46 | 28.74 | 0.98 |
| Le Vauclin | M19 | 30.1 | 39.3 | 60.7 | 248329 | 7908 | 31.6 | 2.76 | < | < | 93.47 | 2.88 | 56.12 | 23.13 | 1.62 | 5.97 | 0.44 | 59.00 | 31.14 | 90.13 | 0.98 |
| Le Vauclin | M20 | 16.8 | 40.1 | 59.9 | 242350 | 8976 | 27.0 | 3.57 | < | < | 113.47 | 0.55 | 84.85 | 34.63 | 1.15 | 9.56 | 0.26 | 85.40 | 45.58 | 130.99 | 1.15 |
| Le François | M21 | 11.9 | 47.7 | 52.3 | 224056 | 13049 | 20.0 | 4.61 | < | < | 56.15 | 0.78 | 39.74 | 23.4 | 1.19 | 1.885 | 0.05 | 40.51 | 26.48 | 66.99 | 1.14 |
| Saint Félix | G3 | 21.1 | 43.2 | 56.8 | 206612 | 10045 | 20.8 | 2.80 | < | < | 74.82 | 0.20 | 49.84 | 5.00 | 16.63 | 1.16 | 0.30 | 50.04 | 23.06 | 73.10 | 0.97 |
| St Anne | G04 | 22.7 | 44.5 | 55.5 | 208676 | 10175 | 20.6 | 2.74 | 1.25 | < | 80.82 | 1.87 | 53.03 | 3.15 | 17.45 | 0.94 | 1.72 | 49.86 | 23.26 | 73.12 | 0.91 |
| St François | G05&06 | 20.7 | 42.7 | 57.2 | 236279 | 8157 | 29.0 | 2.82 | < | < | 89.37 | 0.20 | 68.11 | 7.84 | 4.40 | 2.03 | 0.25 | 68.31 | 14.48 | 82.79 | 0.91 |
| St François | G06 | 26.7 | 50.3 | 49.7 | 193320 | 6095 | 31.6 | 2.17 | < | < | 74.59 | 0.17 | 50.20 | 9.20 | 3.35 | 1.06 | 0.78 | 50.37 | 14.38 | 64.76 | 0.90 |
| Le Moule | G07 | 19.5 | 40.8 | 59.2 | 225171 | 9113 | 26.1 | 3.03 | < | < | 99.82 | 0.25 | 73.80 | 5.74 | 3.15 | 1.35 | 0.25 | 74.05 | 10.46 | 84.51 | 0.79 |
| Le Moule | G07&08 | 21.3 | 39.1 | 60.9 | 247452 | 8216 | 30.6 | 3.21 | < | < | 86.425 | 5.30 | 63.89 | 4.33 | 16.10 | 0.42 | 1.07 | 69.19 | 21.87 | 91.06 | 1.06 |
| St François | G08 | 21.5 | 36.3 | 63.7 | 245714 | 9149 | 27.1 | 2.97 | < | < | 87.32 | 0.23 | 59.55 | 5.10 | 4.58 | 1.51 | 0.52 | 59.78 | 11.67 | 71.45 | 0.77 |
| Petit Bourg | G09 | 20.7 | 36.3 | 63.7 | 224867 | 10108 | 22.5 | 3.23 | 28.8 | < | 80.04 | 0.25 | 59.88 | 3.93 | 6.20 | 1.02 | 0.05 | 60.14 | 11.15 | 71.29 | 0.87 |
| Petit Bourg | G09bis | 21.5 | 39.8 | 60.2 | 243958 | 10378 | 23.5 | 2.99 | 24.8 | < | 93.07 | 1.41 | 56.07 | 10.41 | 10.59 | 1.65 | 1.57 | 48.87 | 24.21 | 73.08 | 0.78 |
| Cap. Belle Eau | G11 | 18.4 | 38.0 | 62.0 | 254734 | 10493 | 24.4 | 3.36 | 351.3 | 8.5 | 93.27 | 0.40 | 68.04 | 10.87 | 7.47 | 2.18 | 0.71 | 68.44 | 21.20 | 89.65 | 0.96 |
| Vieux Fort | G14 | 17.9 | 41.3 | 58.7 | 209476 | 9325 | 22.6 | 3.28 | 19.8 | < | 91.67 | 4.53 | 55.80 | 2.05 | 23.74 | 0.95 | 2.27 | 60.33 | 29.02 | 89.35 | 0.98 |
| Cap. Belle Eau | G15 | 26.6 | 35.7 | 64.3 | 227284 | 8667 | 26.3 | 2.61 | 1927.9 | 35.2 | 83.97 | 0.25 | 62.68 | 1.79 | 4.61 | 0.55 | 0.05 | 62.92 | 6.95 | 69.88 | 0.83 |
| La Désirade | G17 | 21.9 | 48.0 | 52.0 | 182304 | 10804 | 17.1 | 2.61 | < | < | 115.03 | 0.13 | 84.73 | 2.71 | 7.00 | 2.57 | 0.43 | 84.87 | 12.68 | 97.54 | 0.85 |
| Les Saintes | G18 | 15.4 | 45.9 | 54.1 | 196824 | 12035 | 16.4 | 3.50 | < | < | 104.43 | 1.49 | 79.83 | 5.21 | 12.82 | 2.28 | 1.09 | 81.32 | 21.37 | 102.68 | 0.99 |
| Marie Galante | G19 | 27.4 | 46.7 | 53.25 | 218393 | 9275 | 23.5 | 2.69 | 7.7 | < | 132.57 | 0.35 | 104.28 | 3.58 | 17.87 | 3.38 | 0.05 | 104.63 | 24.82 | 129.45 | 0.96 |
| Deshaies | G20 | 30.5 | 44.9 | 55.1 | 190175 | 9871 | 19.8 | 2.45 | < | < | 68.3 | 8.41 | 41.43 | 2.79 | 7.02 | 2.37 | 0.99 | 49.85 | 13.14 | 62.99 | 0.89 |

**Table A2.**

| **Municipality** | **Site** | | **Dry matter** | | **Mineral matter** | | | | **Organic matter** | **Total organic carbon** | | | | **Nitrogen** | | **C/N** | | **OM**  **/DM** | **CLD** | | **5b-hydro CLD** | **As** | | **As(III)** | **As(V)** | | **MMA** | | | | **DMA** | | **AsB** | | **AsC** | | | | **As inorg** | **As org** | | | | **As Tot Calc.** | |
| --- | --- | --- | --- | --- | --- | --- | --- | --- | --- | --- | --- | --- | --- | --- | --- | --- | --- | --- | --- | --- | --- | --- | --- | --- | --- | --- | --- | --- | --- | --- | --- | --- | --- | --- | --- | --- | --- | --- | --- | --- | --- | --- | --- | --- | --- |
|  |  | **%** | | **%** | | **%** | | **mg/kg dw** | | | | **mg(N)**  **/kg dw** | | | **ratio** | | **ratio** | **µg/kg dw** | | **µg/kg dw** | **µg/kg dw** | | **µg/kg dw** | **µg/kg dw** | | **µg/kg dw** | | | **µg/kg dw** | | **µg/kg dw** | | | **µg/kg dw** | | **µg/kg dw** | | **µg/kg dw** | | | | **µg/kg dw** | | |  |
| Le Diamant | M02 | 20.5 | | 48.1 | | 51.9 | | 202150 | | | | 7977 | | | 25.7 | | 2.69 | < | | < | 88.52 | | 0.32 | 59.17 | | 21.84 | | | 1.25 | | 7.57 | | | 0.05 | | 59.49 | | 30.65 | | | | 90.15 | | |  |
| Le Diamant | 02_1 | 27.6 | | 63.2 | | 36.8 | | 168761 | | | | 5714 | | | 29.5 | | 1.33 | < | | < | 59.6 | | 0.28 | 31.9 | | 8.48 | | | 2.88 | | 3.87 | | | 0.05 | | 32.18 | | 15.23 | | | | 47.41 | | |  |
| Le Diamant | 02_2 | 18.5 | | 43.6 | | 56.4 | | 191807 | | | | 8664 | | | 22.1 | | 3.05 | < | | < | 102.6 | | 0.29 | 68.5 | | 22.6 | | | 1.13 | | 6.84 | | | 0.05 | | 68.79 | | 30.57 | | | | 99.36 | | |  |
| Le Diamant | 02_3 | 17.6 | | 43.5 | | 56.5 | | 213378 | | | | 8989 | | | 23.7 | | 3.21 | < | | < | 101.3 | | 0.33 | 79.1 | | 20.9 | | | 0.94 | | 5.98 | | | 0.05 | | 79.43 | | 27.82 | | | | 107.25 | | |  |
| Le Diamant | 02_4 | 18.2 | | 42 | | 58 | 234655 | | | | 8542 | | 27.4 | | | 3.19 | < | | < | 90.6 | | 0.38 | 57.2 | | 35.4 | | | 0.05 | | 13.6 | | 0.05 | | | 57.58 | | 49 | | | | 106.58 | |  |  |  |
| Sainte Anne | 04_1 | 25.6 | | 56.6 | | 43.4 | 160694 | | | | 7138 | | 22.5 | | | 1.70 | < | | < | 11.4 | | 1.39 | 3 | | 1.88 | | | 2.03 | | 2.19 | | 0.7 | | | 4.39 | | 6.8 | | | | 11.19 | |  |  |  |
| Sainte Anne | 04_2 | 16.6 | | 45.7 | | 54.3 | 227250 | | | | 7714 | | 29.5 | | | 3.27 | < | | < | 78.47 | | 1.75 | 57.2 | | 23.3 | | | 1.6 | | 7.48 | | 1.18 | | | 58.95 | | 33.56 | | | | 92.51 | |  |  |  |
| Sainte Anne | 04_3 | 17.6 | | 38.8 | | 61.2 | 240504 | | | | 8376 | | 28.7 | | | 3.48 | < | | < | 90.7 | | 0.025 | 46.4 | | 30.1 | | | 1.35 | | 8.19 | | 0.05 | | | 46.4 | | 39.64 | | | | 86.04 | |  |  |  |
| Sainte Anne | 04_4 | 15.4 | | 46.9 | | 53.1 | 216914 | | | | 8687 | | 25.0 | | | 3.45 | < | | < | 127.8 | | 0.18 | 95.3 | | 33.9 | | | 2.11 | | 12.3 | | 0.26 | | | 95.48 | | 48.57 | | | | 144.05 | |  |  |  |
| Le Vauclin | 06_4 | 18.3 | | 38.5 | | 61.5 | 264265 | | | | 8390 | | 31.5 | | | 3.36 | < | | < | 86 | | 0.15 | 48 | | 18.6 | | | 0.97 | | 6.03 | | 0.29 | | | 48.15 | | 25.89 | | | | 74.04 | |  |  |  |
| Le Vauclin | 07_1 | 82.4 | | 38.1 | | 61.9 | 258565 | | | | 7570 | | 34.2 | | | 0.75 | < | | < | 78.4 | | 0.16 | 44 | | 24.2 | | | 2.18 | | 4.94 | | 0.35 | | | 44.16 | | 31.67 | | | | 75.83 | |  |  |  |
| Le Vauclin | 07_2 | 23.3 | | 43.4 | | 56.6 | 220508 | | | | 7661 | | 28.8 | | | 2.43 | < | | < | 110.7 | | 0.025 | 71.9 | | 24.3 | | | 1.58 | | 5.94 | | 0.05 | | | 71.9 | | 31.82 | | | | 103.72 | |  |  |  |
| Le Vauclin | 07_3 | 20.2 | | 39.4 | | 60.6 | 242729 | | | | 7957 | | 30.5 | | | 3.00 | < | | < | 78.4 | | 0.24 | 42 | | 18.8 | | | 0.87 | | 4.87 | | 0.44 | | | 42.24 | | 24.98 | | | | 67.22 | |  |  |  |
| Le Marigot | 09_1 | 69.3 | | 40.2 | | 59.8 | 175919 | | | | 7128 | | 24.7 | | | 0.86 | 715.7 | | 12.6 | 57.7 | | 0.74 | 19.02 | | 12.8 | | | 4.53 | | 3.17 | | 1.31 | | | 19.76 | | 21.81 | | | | 41.57 | |  |  |  |
| Le Marigot | 09_2 | 22 | | 48.6 | | 51.4 | 177120 | | | | 6597 | | 26.8 | | | 2.34 | 213.6 | | < | 77.09 | | 0.2 | 32.1 | | 18.6 | | | 0.68 | | 4.43 | | 0.35 | | | 32.3 | | 24.06 | | | | 56.36 | |  |  |  |
| Le Marigot | 09_3 | 15.7 | | 42 | | 58 | 202670 | | | | 8062 | | 25.1 | | | 3.69 | 222.9 | | < | 52 | | 0.32 | 45.1 | | 3.65 | | | 1.06 | | 6.71 | | 0.65 | | | 45.42 | | 12.07 | | | | 57.49 | |  |  |  |
| Le Marigot | 09_4 | 17 | | 40.1 | | 59.9 | 233279 | | | | 8603 | | 27.1 | | | 3.52 | 276.5 | | < | 100.5 | | 0.11 | 57.1 | | 36.7 | | | 0.74 | | 5.97 | | 0.05 | | | 57.21 | | 43.41 | | | | 100.62 | |  |  |  |
| Ste Marie | 10_1 | 56.6 | | 47.5 | | 52.5 | 156987 | | | | 7981 | | 19.7 | | | 0.93 | 49.5 | | < | 70.7 | | 0.25 | 55.6 | | 17.2 | | | 1.7 | | 4.57 | | 0.05 | | | 55.85 | | 23.47 | | | | 79.32 | |  |  |  |
| Ste Marie | 10_2 | 19.8 | | 45.6 | | 54.4 | 215461 | | | | 7158 | | 30.1 | | | 2.75 | 101.0 | | < | 90.39 | | 0.06 | 55.2 | | 27 | | | 0.69 | | 8.43 | | 0.05 | | | 55.26 | | 36.12 | | | | 91.38 | |  |  |  |
| Ste Marie | 10_3 | 14.6 | | 43.3 | | 56.7 | 194473 | | | | 7229 | | 26.9 | | | 3.88 | 95.9 | | < | 104.4 | | 1.86 | 51.7 | | 25.1 | | | 3.66 | | 6.76 | | 2.69 | | | 53.56 | | 38.21 | | | | 91.77 | |  |  |  |
| Ste Marie | 10_4 | 16.3 | | 40.2 | | 59.8 | 228521 | | | | 7680 | | 29.8 | | | 3.67 | 104.3 | | < | 101.4 | | 0.025 | 58.7 | | 38.2 | | | 0.05 | | 11.5 | | 0.05 | | | 58.7 | | 49.7 | | | | 108.4 | |  |  |  |
| La Trinité | 12_1 | 61.4 | | 41 | | 59 | 198754 | | | | 8581 | | 23.2 | | | 0.96 | < | | < | 56.5 | | 0.08 | 28.3 | | 20 | | | 2.6 | | 6.28 | | 0.05 | | | 28.38 | | 28.88 | | | | 57.26 | |  |  |  |
| La Trinité | 12_2 | 22.6 | | 50.8 | | 49.2 | 199018 | | | | 6786 | | 29.3 | | | 2.18 | 4.4 | | < | 67.22 | | 0.35 | 41.3 | | 20.2 | | | 1.61 | | 6.32 | | 0.05 | | | 41.65 | | 28.13 | | | | 69.78 | |  |  |  |
| La Trinité | 12_3 | 16.5 | | 40.1 | | 59.9 | 214664 | | | | 8328 | | 25.8 | | | 3.63 | 1.2 | | < | 92.6 | | 0.66 | 52.1 | | 26.7 | | | 1.59 | | 6.91 | | 0.09 | | | 52.76 | | 35.29 | | | | 88.05 | |  |  |  |
| La Trinité | 12_4 | 17.2 | | 38.8 | | 61.2 | 229947 | | | | 8196 | | 28.1 | | | 3.56 | 5.8 | | < | 90.4 | | 0.24 | 41.8 | | 24.2 | | | 0.42 | | 6.53 | | 0.05 | | | 42.04 | | 31.15 | | | | 73.19 | |  |  |  |
| La Trinité | 13_1 | 60.2 | | 37.6 | | 62.4 | 228137 | | | | 8575 | | 26.6 | | | 1.04 | < | | < | 61.8 | | 0.22 | 27.3 | | 12.9 | | | 3.76 | | 6.53 | | 5.16 | | | 27.52 | | 23.19 | | | | 50.71 | |  |  |  |
| La Trinité | 13_2 | 17.5 | | 42.9 | | 57.1 | 212675 | | | | 8894 | | 23.9 | | | 3.26 | < | | < | 119.4 | | 0.81 | 95.5 | | 26.5 | | | 2.93 | | 6.11 | | 1.15 | | | 96.31 | | 35.54 | | | | 131.85 | |  |  |  |
| La Trinité | 13_3 | 14.3 | | 45.4 | | 54.6 | 196698 | | | | 9409 | | 20.9 | | | 3.82 | < | | < | 87.7 | | 0.9 | 54.1 | | 26.5 | | | 1.92 | | 6.97 | | 0.05 | | | 55 | | 35.39 | | | | 90.39 | |  |  |  |
| La Trinité | 13_4 | 17.3 | | 38.1 | | 61.9 | 250731 | | | | 9270 | | 27.0 | | | 3.58 | < | | < | 90.7 | | 0.34 | 52.4 | | 29.8 | | | 0.81 | | 5.41 | | 0.05 | | | 52.74 | | 36.02 | | | | 88.76 | |  |  |  |
| La Trinité | 14_1 | 76.1 | | 42.4 | | 57.6 | 204571 | | | | 7616 | | 26.9 | | | 0.76 | 177.4 | | < | 70.2 | | 0.98 | 36.9 | | 21.3 | | | 2.19 | | 5.05 | | 0.26 | | | 37.88 | | 28.8 | | | | 66.68 | |  |  |  |
| La Trinité | 14_2 | 18.9 | | 39.7 | | 60.3 | 233700 | | | | 8486 | | 27.5 | | | 3.19 | 798.9 | | 58.2 | 74.46 | | 0.17 | 51.2 | | 26.7 | | | 0.62 | | 9.49 | | 0.05 | | | 51.37 | | 36.81 | | | | 88.18 | |  |  |  |
| La Trinité | 14_3 | 14.3 | | 38.8 | | 61.2 | 238879 | | | | 8079 | | 29.6 | | | 4.28 | 648.3 | | 40.6 | 95.1 | | 0.15 | 62.6 | | 30.9 | | | 0.47 | | 8.99 | | 0.05 | | | 62.75 | | 40.36 | | | | 103.11 | |  |  |  |
| La Trinité | 14_4 | 19.3 | | 34.1 | | 65.9 | 236810 | | | | 10654 | | 22.2 | | | 3.41 | 706.7 | | < | 84.2 | | 0.025 | 38.4 | | 24 | | | 0.05 | | 10.8 | | 0.05 | | | 38.4 | | 34.8 | | | | 73.2 | |  |  |  |
| Le Robert | 15_2 | 19.4 | | 41.8 | | 58.2 | 227770 | | | | 7593 | | 30.0 | | | 3.00 | < | | < | 98.4 | | 2.92 | 51.7 | | 30.5 | | | 4.87 | | 8.1 | | 1.9 | | | 54.62 | | 45.37 | | | | 99.99 | |  |  |  |
| Le Robert | 15_3 | 16.5 | | 41.8 | | 58.2 | 222153 | | | | 8245 | | 26.9 | | | 3.53 | < | | < | 106.8 | | 0.61 | 66.6 | | 42.77 | | | 0.92 | | 13.7 | | 0.05 | | | 67.21 | | 57.39 | | | | 124.6 | |  |  |  |
| Le Robert | 15_4 | 17.6 | | 44 | | 56 | 215849 | | | | 10484 | | 20.6 | | | 3.18 | < | | < | 75.6 | | 0.99 | 42.4 | | 18.1 | | | 2.34 | | 6.68 | | 0.22 | | | 43.39 | | 27.12 | | | | 70.51 | |  |  |  |
| Le François | 16_1 | 46.3 | | 40.5 | | 59.5 | 234554 | | | | 8432 | | 27.8 | | | 1.29 | 51.0 | | 6.5 | 37 | | 0.17 | 21.4 | | 5.6 | | | 3.02 | | 2.15 | | 0.54 | | | 21.57 | | 11.31 | | | | 32.88 | |  |  |  |
| Le François | 16_2 | 22.2 | | 39 | | 61 | 246603 | | | | 9806 | | 25.1 | | | 2.75 | 164.4 | | 1.2 | 92.53 | | 0.12 | 46.5 | | 19.8 | | | 1.9 | | 6.6 | | 0.05 | | | 46.62 | | 28.3 | | | | 74.92 | |  |  |  |
| Le François | 16_3 | 13.1 | | 46.2 | | 53.8 | 201133 | | | | 8069 | | 24.9 | | | 4.11 | 1.25 | | 1.2 | 123.5 | | 0.025 | 86.3 | | 36 | | | 0.05 | | 4.71 | | 0.05 | | | 86.3 | | 40.71 | | | | 127.01 | |  |  |  |
| Le François | 16_4 | 18.6 | | 35.4 | | 64.6 | 238658 | | | | 8607 | | 27.7 | | | 3.47 | 89.8 | | 12.4 | 103.7 | | 0.13 | 70.9 | | 32.9 | | | 1.14 | | 8.85 | | 0.32 | | | 71.03 | | 43.21 | | | | 114.24 | |  |  |  |
| Le Robert | 17_1 | 69.3 | | 26 | | 74 | 280565 | | | | 12689 | | 22.1 | | | 1.07 | < | | < | 9.5 | | 0.37 | 3.57 | | 2.62 | | | 0.05 | | 2.64 | | 0.05 | | | 3.94 | | 5.26 | | | | 9.2 | |  |  |  |
| Le Robert | 17_2 | 21.8 | | 43.8 | | 56.2 | 192858 | | | | 9507 | | 20.3 | | | 2.58 | < | | < | 128.3 | | 0.05 | 95.6 | | 34.1 | | | 2.14 | | 9.56 | | 0.05 | | | 95.65 | | 45.8 | | | | 141.45 | |  |  |  |
| Le Robert | 17_3 | 16.6 | | 45.6 | | 54.4 | 201114 | | | | 9233 | | 21.8 | | | 3.277 | < | | < | 100.4 | | 0.28 | 55 | | 18.4 | | | 0.41 | | 7.94 | | 0.05 | | | 55.28 | | 26.75 | | | | 82.03 | |  |  |  |
| Le Robert | 17_4 | 16.6 | | 43.2 | | 56.8 | 210857 | | | | 9999 | | 21.1 | | | 3.42 | < | | < | 89.4 | | 0.14 | 57.1 | | 17.8 | | | 0.18 | | 7.69 | | 0.05 | | | 57.24 | | 25.67 | | | | 82.91 | |  |  |  |
| Le Robert | 18_1 | 57 | | 38.2 | | 61.8 | 211404 | | | | 13422 | | 15.8 | | | 1.08 | 12.3 | | < | 9.9 | | 0.18 | 8.17 | | 0.72 | | | 0.58 | | 1.49 | | 0.05 | | | 8.35 | | 2.79 | | | | 11.14 | |  |  |  |
| Le Robert | 18_2 | 12.3 | | 46.7 | | 53.3 | 186241 | | | | 18877 | | 9.9 | | | 4.33 | < | | < | 14.17 | | 0.12 | 3.57 | | 0.99 | | | 0.78 | | 5.1 | | 0.05 | | | 3.69 | | 6.87 | | | | 10.56 | |  |  |  |
| Le Robert | 18_3 | 16 | | 43 | | 57 | 216354 | | | | 10439 | | 20.7 | | | 3.56 | < | | < | 43.6 | | 0.98 | 29.5 | | 10.2 | | | 0.77 | | 4.71 | | 0.05 | | | 30.48 | | 15.68 | | | | 46.16 | |  |  |  |
| Le Robert | 18_4 | 18.7 | | 38.3 | | 61.7 | 261565 | | | | 10087 | | 25.9 | | | 3.30 | < | | < | 47.7 | | 0.58 | 26 | | 13.9 | | | 0.8 | | 5.82 | | 0.82 | | | 26.58 | | 20.52 | | | | 47.1 | |  |  |  |
| Le Vauclin | 19_1 | 66.3 | | 36.3 | | 63.7 | 273709 | | | | 7386 | | 37.1 | | | 0.96 | < | | < | 51.1 | | 1.92 | 29.6 | | 16.1 | | | 1.92 | | 3.11 | | 0.05 | | | 31.52 | | 21.13 | | | | 52.65 | |  |  |  |
| Le Vauclin | 19_2 | 20.1 | | 40.2 | | 59.8 | 230273 | | | | 8191 | | 28.1 | | | 2.98 | < | | < | 106 | | 4.81 | 60 | | 19.8 | | | 2.02 | | 5.71 | | 0.66 | | | 64.81 | | 28.19 | | | | 93 | |  |  |  |
| Le Vauclin | 19_3 | 15.3 | | 42.3 | | 57.7 | 229947 | | | | 8331 | | 27.6 | | | 3.77 | < | | < | 113.7 | | 4.76 | 59.1 | | 19.3 | | | 1.36 | | 6.46 | | 1 | | | 63.86 | | 28.12 | | | | 91.98 | |  |  |  |
| Le Vauclin | 19_4 | 18.6 | | 38.3 | | 61.7 | 259389 | | | | 7726 | | 33.6 | | | 3.32 | < | | < | 103.1 | | 0.025 | 75.8 | | 37.3 | | | 1.2 | | 8.61 | | 0.05 | | | 75.8 | | 47.11 | | | | 122.91 | |  |  |  |
| Le Vauclin | 20_1 | 16 | | 40.8 | | 59.2 | 247230 | | | | 8662 | | 28.5 | | | 3.7 | < | | < | 115.2 | | 1.26 | 83.85 | | 44 | | | 1.26 | | 8.88 | | 0.05 | | | 85.11 | | 54.14 | | | | 139.25 | |  |  |  |
| Le Vauclin | 20_2 | 15.9 | | 42 | | 58 | 238399 | | | | 8896 | | 26.8 | | | 3.6 | < | | < | 124.3 | | 0.22 | 92.6 | | 39.7 | | | 1.54 | | 10.3 | | 0.37 | | | 92.82 | | 51.91 | | | | 144.73 | |  |  |  |
| Le Vauclin | 20_3 | 18.5 | | 37.6 | | 62.4 | 241420 | | | | 9371 | | 25.8 | | | 3.37 | < | | < | 100.9 | | 0.18 | 78.1 | | 20.2 | | | 0.64 | | 9.51 | | 0.35 | | | 78.28 | | 30.7 | | | | 108.98 | |  |  |  |
| Le François | 21_3 | 8.8 | | 52.2 | | 47.8 | 217662 | | | | 17806 | | 12.2 | | | 5.43 | < | | < | 13.9 | | 1.54 | 3.58 | | 4.8 | | | 2.3 | | 2.76 | | 0.05 | | | 5.12 | | 9.86 | | | | 14.98 | |  |  |  |
| Le François | 21_4 | 15 | | 43.2 | | 56.8 | 230451 | | | | 8292 | | 27.8 | | | 3.79 | < | | < | 98.4 | | 0.025 | 75.9 | | 42 | | | 0.09 | | 1.01 | | 0.05 | | | 75.9 | | 43.1 | | | | 119 | |  |  |  |

**Table A3.**
